# Supplementary material
Source: Springer Nature journal article supplement (https://www.springermedizin.de/resource/supplementary/12872_2014_746_MOESM4_ESM.pdf/9430804)
Supplement: MOESM4 [file 9430804]

**Figure 6**

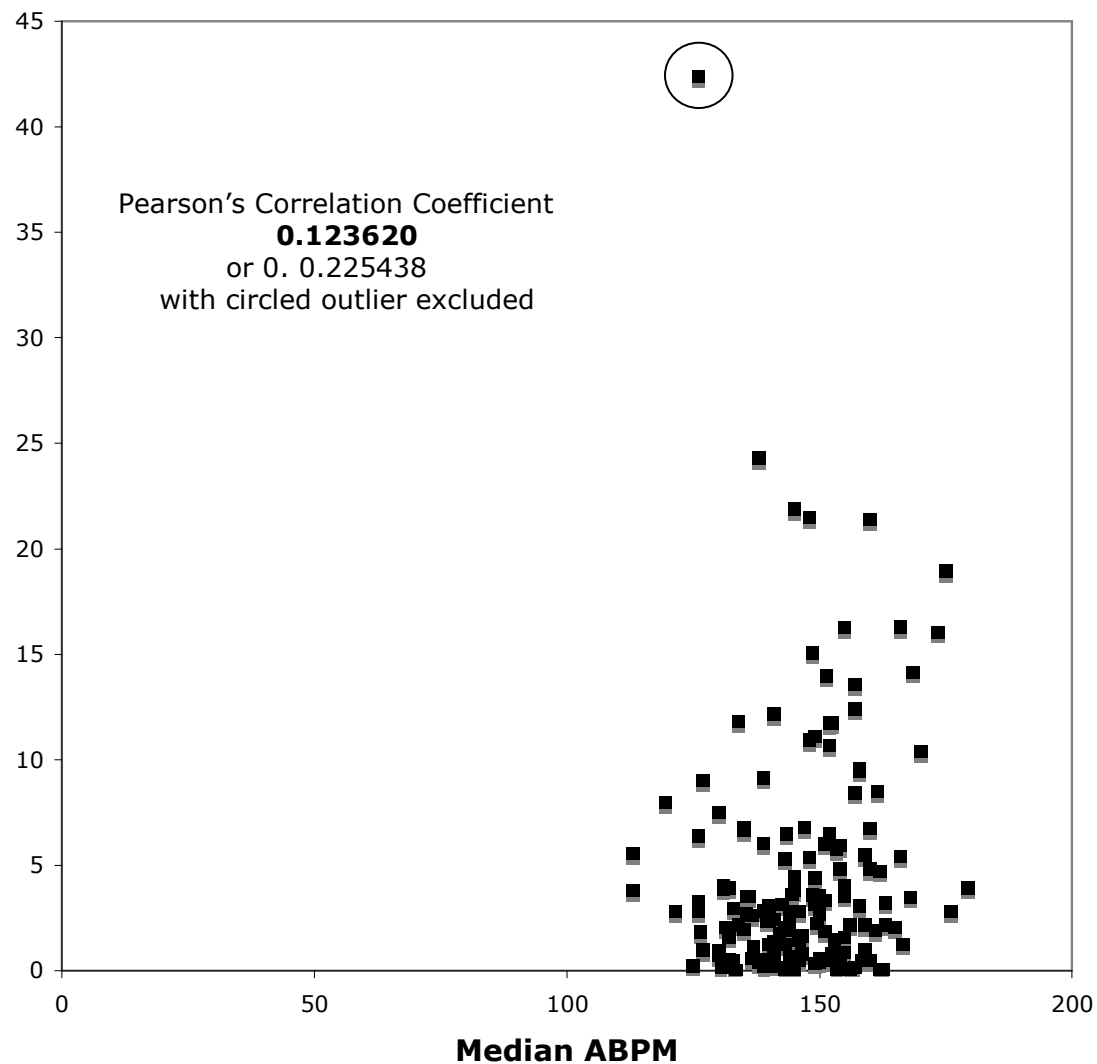

**A**

| CVR <sup>ABPM</sup> versus ABPM |                 |          |
|---------------------------------|-----------------|----------|
|                                 | unedited        | edited   |
| 1 <sup>st</sup> Quartile        | 0.069619        | 0.169575 |
| Median                          | <b>0.123620</b> | 0.225438 |
| 3 <sup>rd</sup> Quartile        | 0.129922        | 0.220760 |

**B**

| CVR <sup>HBPM</sup> versus HBPM |          |           |
|---------------------------------|----------|-----------|
|                                 | unedited | edited    |
| 1 <sup>st</sup> Quartile        | 0.149372 | 0.212444  |
| Median                          | 0.187254 | 0.260741  |
| 3 <sup>rd</sup> Quartile        | 0.209458 | 0.2274710 |

**C**

| CVR <sup>130</sup> versus ABPM |           |          |
|--------------------------------|-----------|----------|
|                                | unedited  | edited   |
| 1 <sup>st</sup> Quartile       | -0.025296 | 0.072690 |
| Median                         | 0.019298  | 0.124296 |
| 3 <sup>rd</sup> Quartile       | 0.021708  | 0.111443 |

**D**

| CVR <sup>130</sup> versus HBPM |          |          |
|--------------------------------|----------|----------|
|                                | unedited | edited   |
| 1 <sup>st</sup> Quartile       | 0.062770 | 0.110721 |
| Median                         | 0.089997 | 0.151086 |
| 3 <sup>rd</sup> Quartile       | 0.108782 | 0.160264 |
